# Supplementary material for: Synthesis, characterization and evaluation of collagen scaffolds crosslinked with aminosilane functionalized silver nanoparticles: in vitro and in vivo studies
Source: Royal Society of Chemistry journal article supplement (doi:10.1039/c4tb02124j), 2015-01-01

## Electronic Supplementary information for

**Synthesis, characterization and evaluation of collagen scaffold crosslinked with functionalized silver nanoparticles for clinical wound healing applications: *in vitro* and *in vivo* studies**

**Abhishek Mandal,<sup>a,b</sup> Santhanam Sekar,<sup>b</sup> N. Chandrasekaran,<sup>a</sup> Amitava Mukherjee,<sup>a\*</sup>  
Thotapalli P. Sastry<sup>b\*</sup>**

<sup>a</sup>Centre for Nano-Biotechnology, VIT University, Vellore 632014, India.

<sup>b</sup>Bio-Products Laboratory, Council of Scientific and Industrial Research (CSIR)-Central Leather Research Institute (CLRI), Adyar, Chennai 600020, Tamil Nadu, India.

\*<sup>a</sup> E-mail address: [amitav@vit.ac.in](mailto:amitav@vit.ac.in)

Tel #: +91-416-220-2620

\*<sup>b</sup> E-mail address: [sastrytp@hotmail.com](mailto:sastrytp@hotmail.com)

Fax #: +91-44-24911589; Tel #: +91-44-24420709

**Figure S1** Schematic representation of the synthesis, functionalization and crosslinking of silver nanoparticles with succinylated collagen.

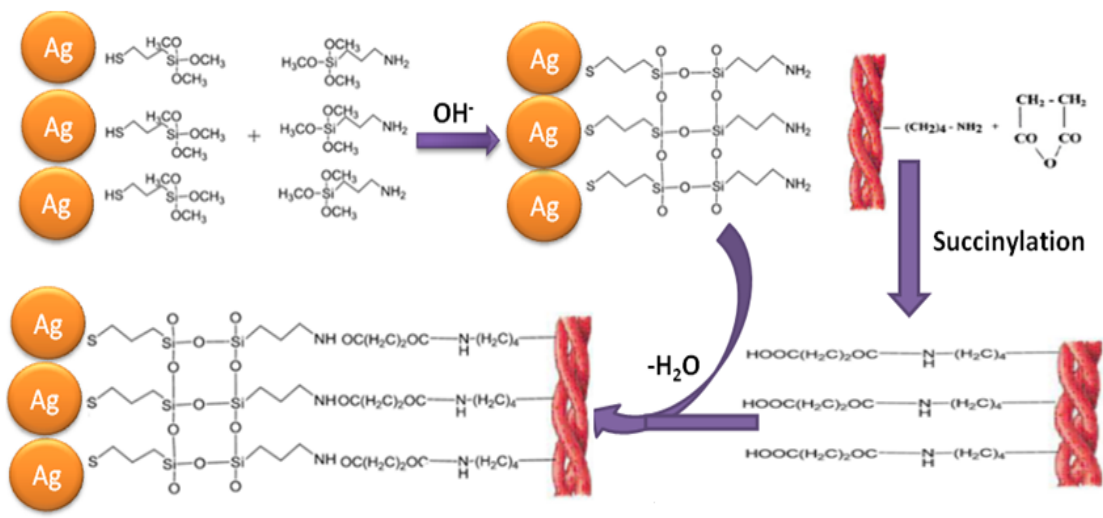

**Figure S2** SDS-PAGE of succinylated collagen (SC) solution.

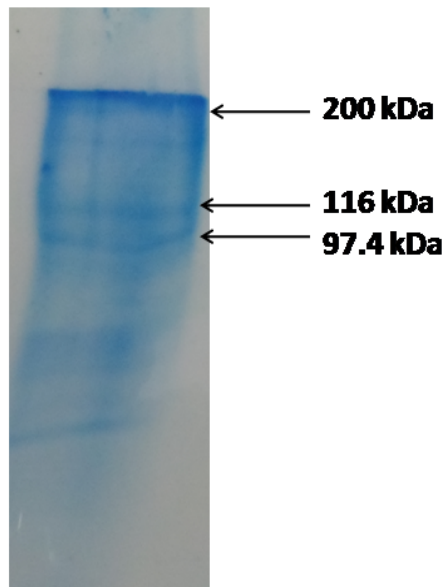

**Figure S3** Fluorescence spectra of a) bare and b) aminosilane functionalized silver nanoparticles.

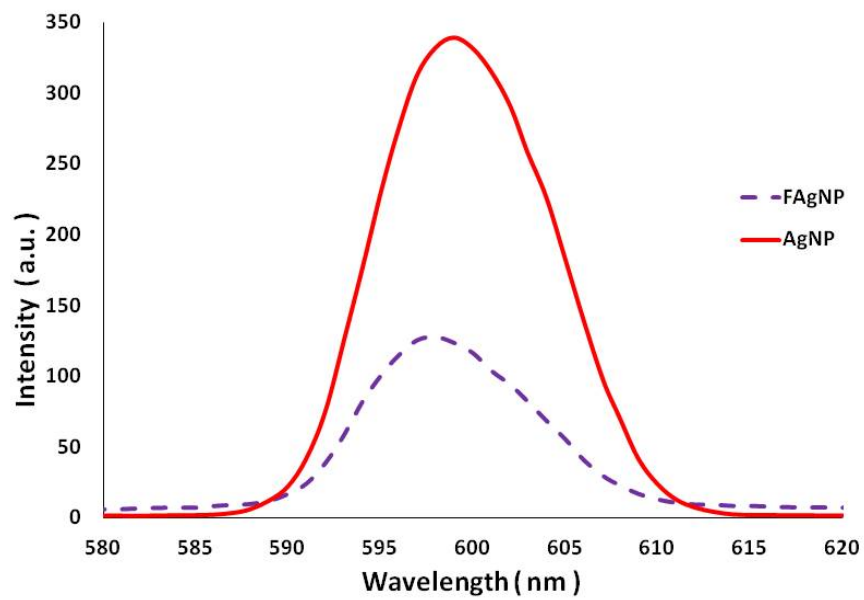

**Figure S4** Particle size distribution of a) silver nanoparticles (AgNPs) and b) functionalized silver nanoparticles (FAGNPs), respectively.

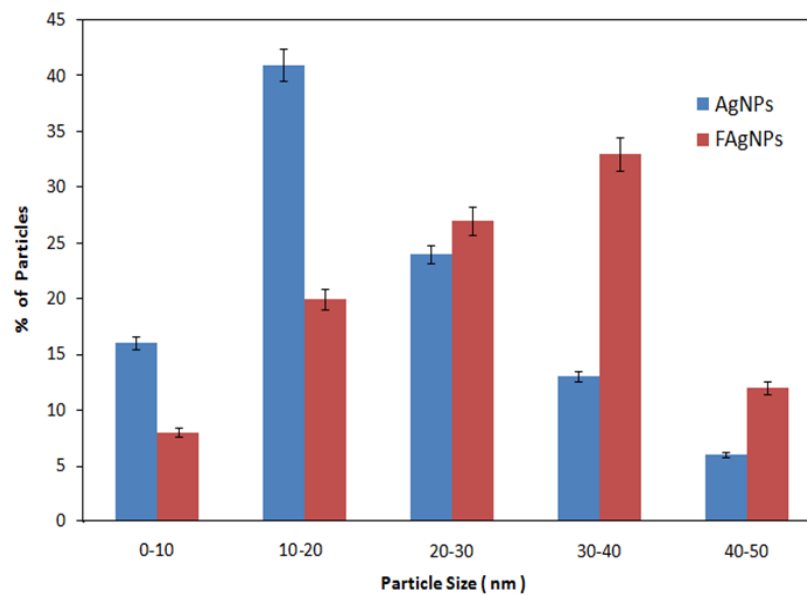

**Figure S5** Percentage of amine content of the scaffolds produced in this study, in relation to non-cross-linked collagen scaffolds. Values are presented as mean  $\pm$  SD ( $n = 3$ ) ( $*p < 0.01$ )

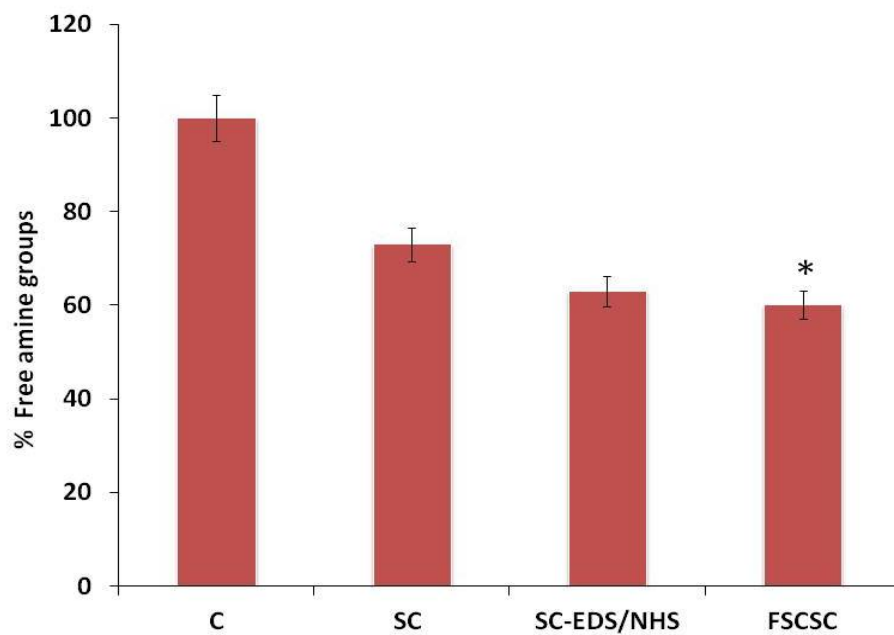

**Figure S6** X-ray photoelectron spectroscopy (XPS) spectra of FSCSC scaffold.

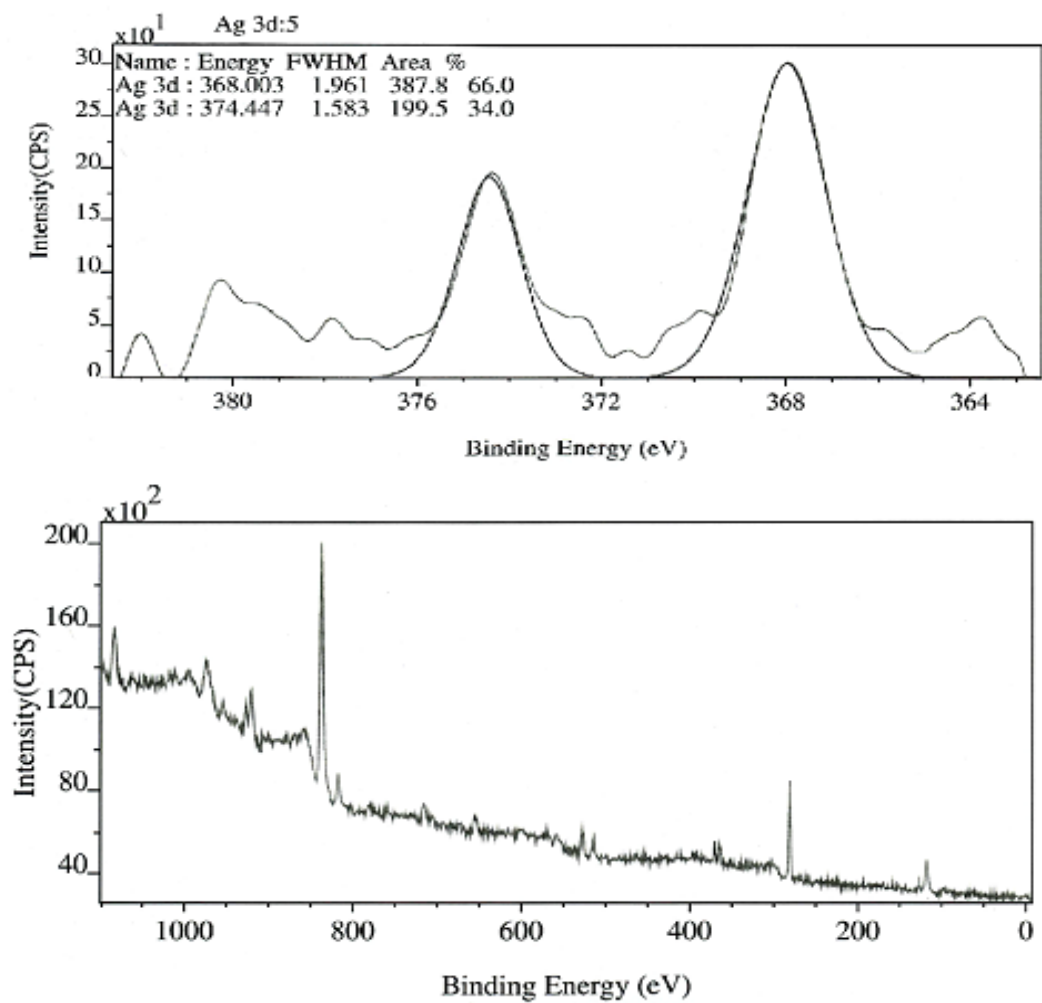

Supplement: c4tb02124j1.pdf [file c4tb02124j1.pdf]
